# Supplementary material for: Intense green-light emission from 9,10-bis (4-(1,2,2-triphenylvinyl)styryl)anthracene emitting electroluminescent devices
Source: Royal Society of Chemistry journal article supplement (doi:10.1039/c5tc01211b), 2015-01-01
Supplement: c5tc01211b1.pdf [file c5tc01211b1.pdf]

*(Submitted to J. Mater. Chem. C)*

## Supporting Information

### **Intense Green-light Emission from 9,10-bis (4-(1,2,2-triphenylvinyl)styryl) anthracene Emitting Electroluminescence Devices**

*Shunyu Jin, Yan Tian, Fei Liu <sup>a,\*</sup>, Jun Chen, Shaozhi Deng <sup>b,\*</sup>, Ningsheng Xu*

*Corresponding author: <sup>a</sup>[liufei@mail.sysu.edu.cn](mailto:liufei@mail.sysu.edu.cn), <sup>b</sup>[stdsz@mail.sysu.edu.cn](mailto:stdsz@mail.sysu.edu.cn)*

State Key Laboratory of Optoelectronic Materials and Technologies,

And Guangdong Province Key Laboratory of Display Material and Technology,

Sun Yat-sen University, Guangzhou 510275, People's Republic of China

## Table of Contents

|                                                                                         |    |
|-----------------------------------------------------------------------------------------|----|
| The synthetic route of TPE-An.....                                                      | S1 |
| Representative mid-infrared spectrum of TPE-An powders.....                             | S2 |
| Typical $^1\text{H}$ NMR spectrum of TPE-An in $\text{CDCl}_3$ .....                    | S3 |
| Typical PL spectrum of TPE-An powders.....                                              | S4 |
| Surface morphology of TPE-An(15 nm) film on ITO glass substrate.....                    | S5 |
| The work function of TPE-An film.....                                                   | S6 |
| The I-V curves of the configuration ITO/ $\text{C}_{60}$ (2.5 nm)/TPE-An (100 nm) ..... | S7 |
| The stabilities of the EL devices on glass and flexible PET substrate.....              | S8 |

## The synthetic route of TPE-An powders

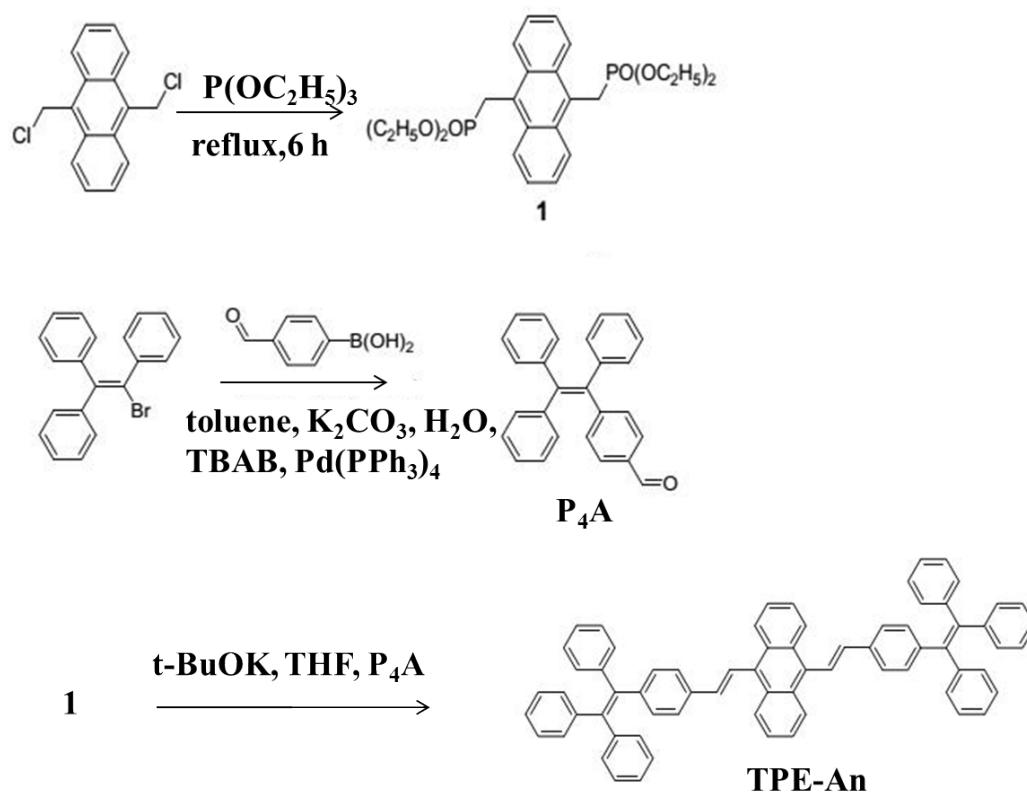

Figure S1. The synthetic route of TPE-An powders

## Representative mid-infrared spectrum of TPE-An powders

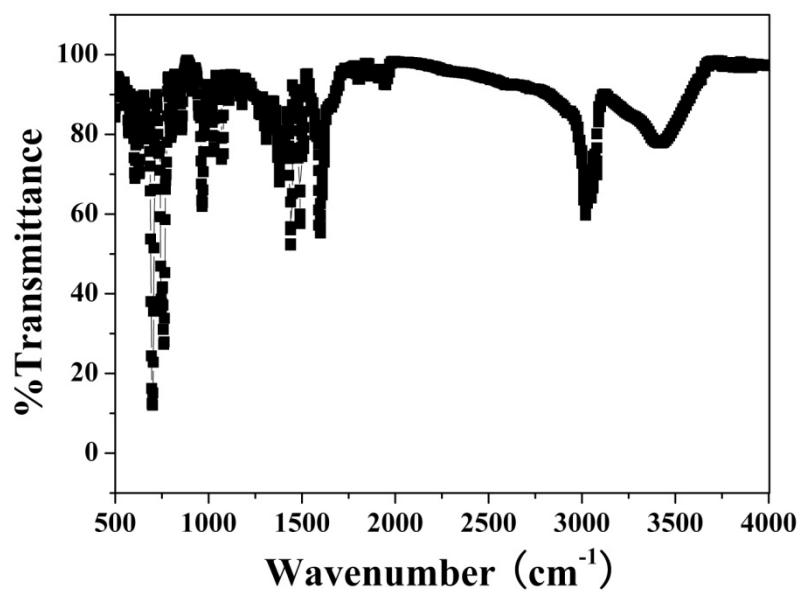

Figure S2. Representative mid-infrared spectrum of TPE-An powders.

## Typical $^1\text{H}$ NMR spectrum of TPE-An in $\text{CDCl}_3$

$^1\text{H}$  NMR(400 MHz,  $\text{CDCl}_3$ )  $\delta$  (ppm): 8.42-7.35 (dd, 4H); 7.90-7.84 (d, 2H); 7.51-7.42 (m, 8H); 7.26-7.05 (m, 34H); 6.90-6.83 (d, 2H).

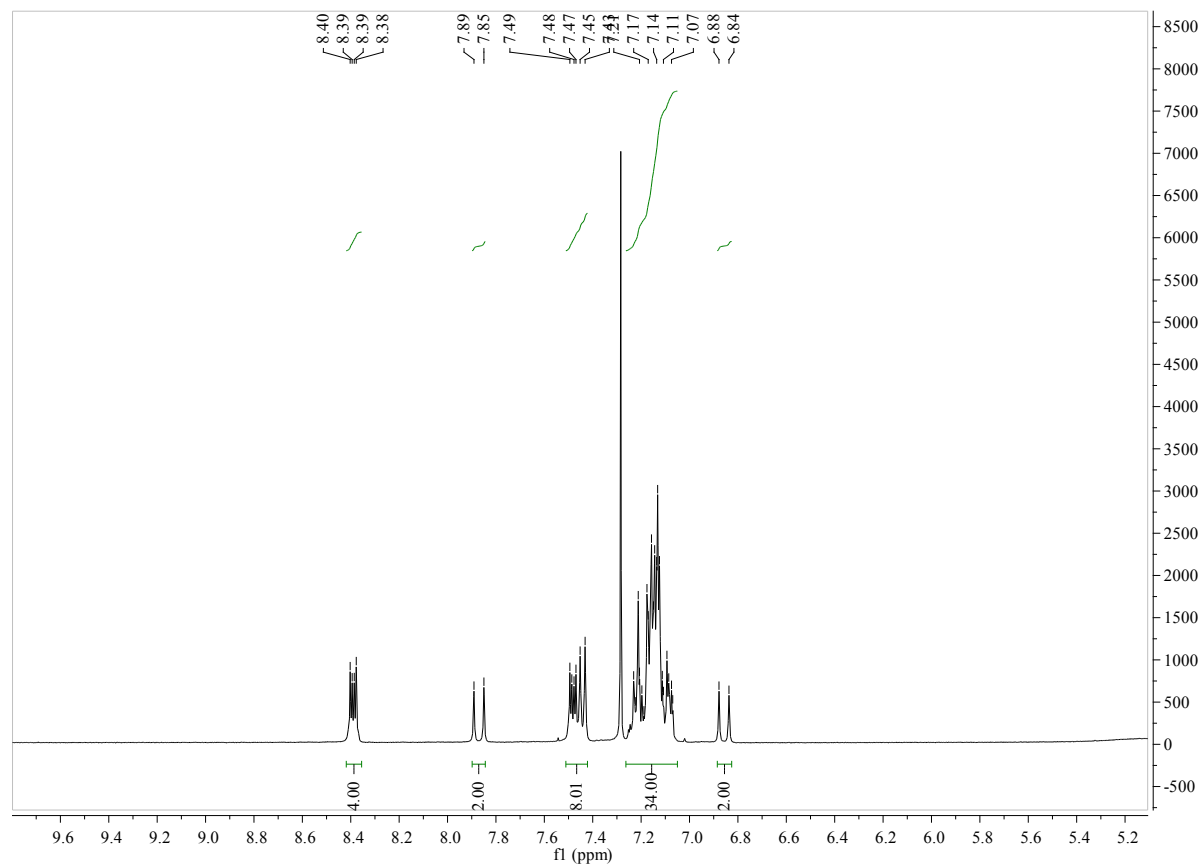

Figure S3. Typical  $^1\text{H}$ NMR Spectrum of TPE-An powders.

## Typical PL spectrum of TPE-An powders

It is found that the TPE-An powders emit a strong green light at 504 nm, which is close to that (514 nm) of TPE-An film.

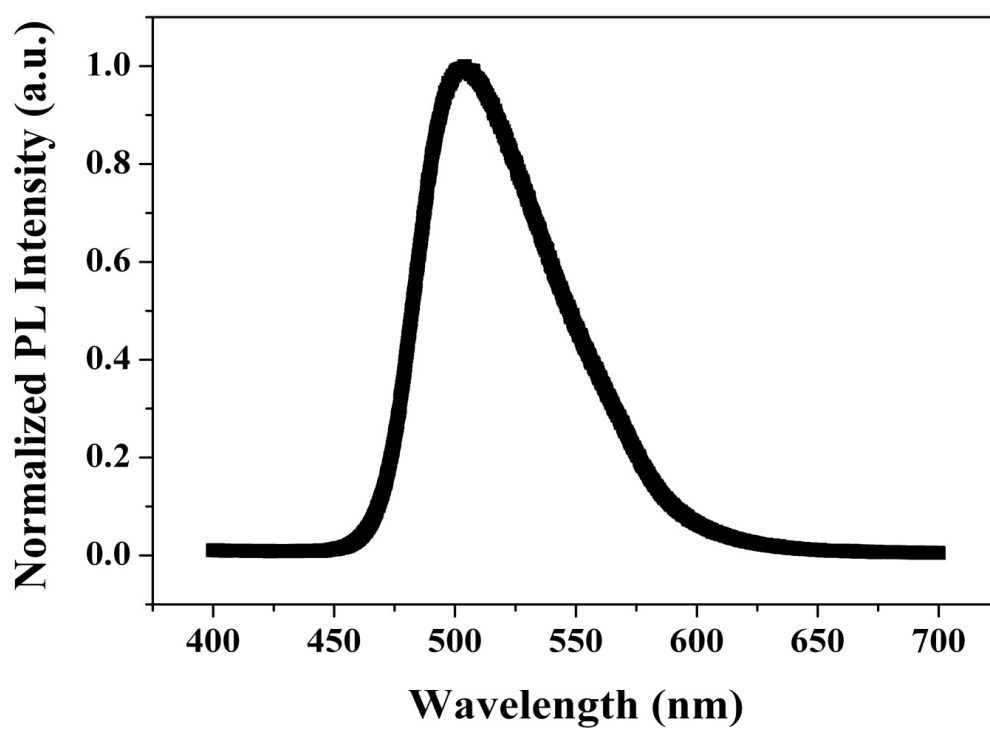

Figure S4. Typical PL spectrum of TPE-An powders.

## Surface morphology of TPE-An (15 nm) film on ITO glass substrate

The morphology of TPE-An(15 nm) film on ITO glass substrate is shown in Fig. S5. The surface roughness of TPE-An film is about 4 nm.

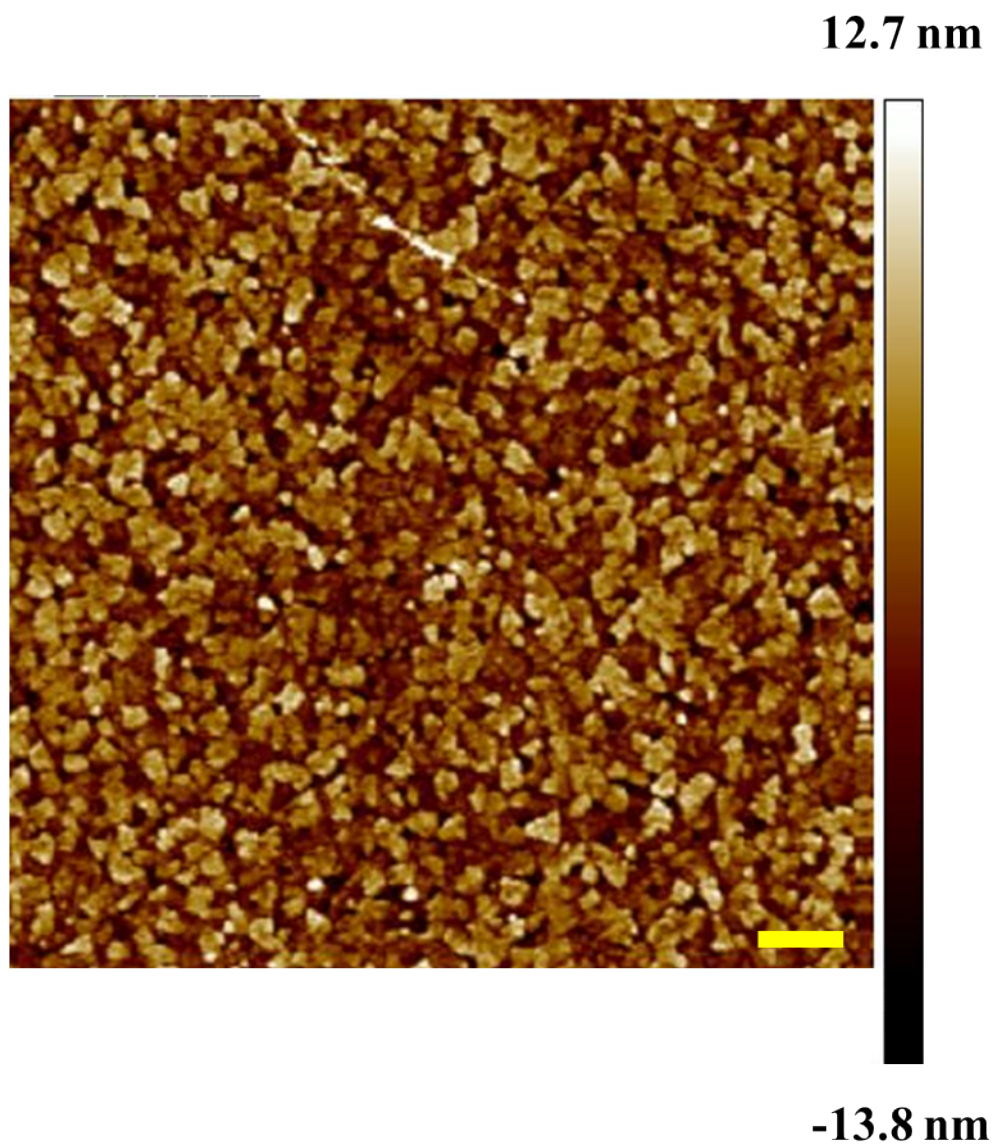

Figure S5. Surface morphology of TPE-An(15 nm) film on ITO glass substrate. Scale bar is 1 μm.

## The work function of TPE-An film

The ultraviolet photoelectron spectroscopy (UPS) technique was used to determine the work function of TPE-An film (100 nm). Depending on the low kinetic energy cut-off, the work function of the as-grown TPE-An film was worked out to be  $4.61 \pm 0.01$  eV.

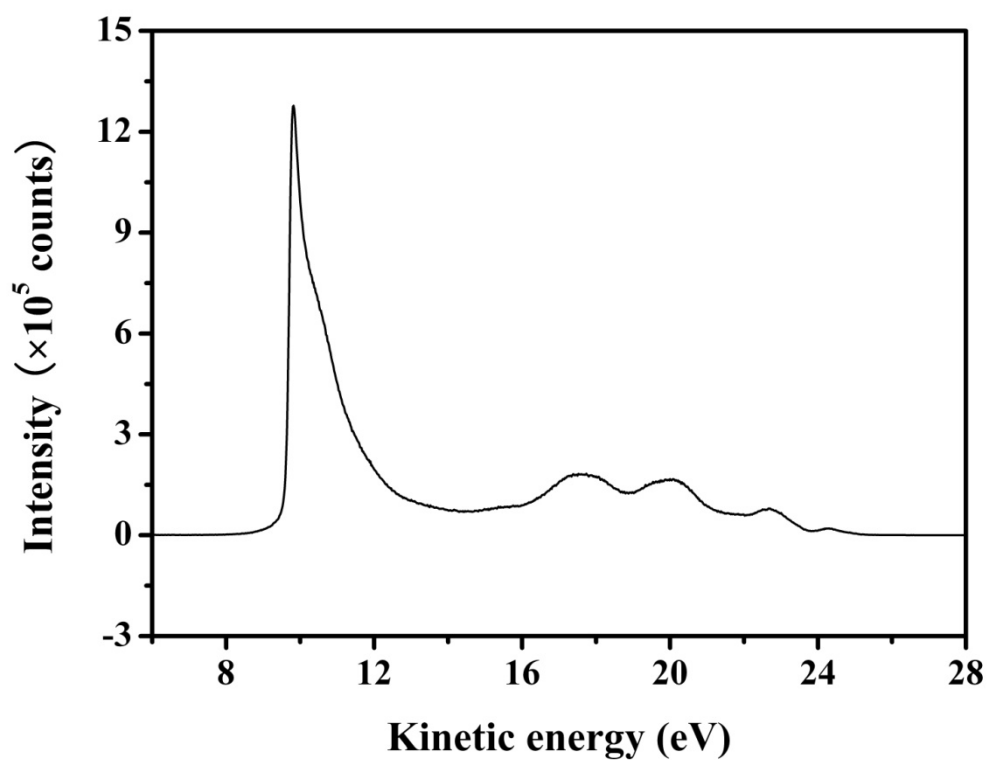

Figure S6. Typical UPS spectrum of the as-grown TPE-An film.



### The I-V curves of the configuration ITO/C<sub>60</sub> (2.5 nm)/TPE-An(100 nm)

The I-V curves of the multilayered film were measured by Keithley 4200 system. It is found in Figure S7 that the I-V curve of the configuration ITO/C<sub>60</sub> (2.5 nm)/TPE-An (100 nm) are nearly linear, which proves a quasi-ohmic contact has been established between the ITO and TPE-An film.

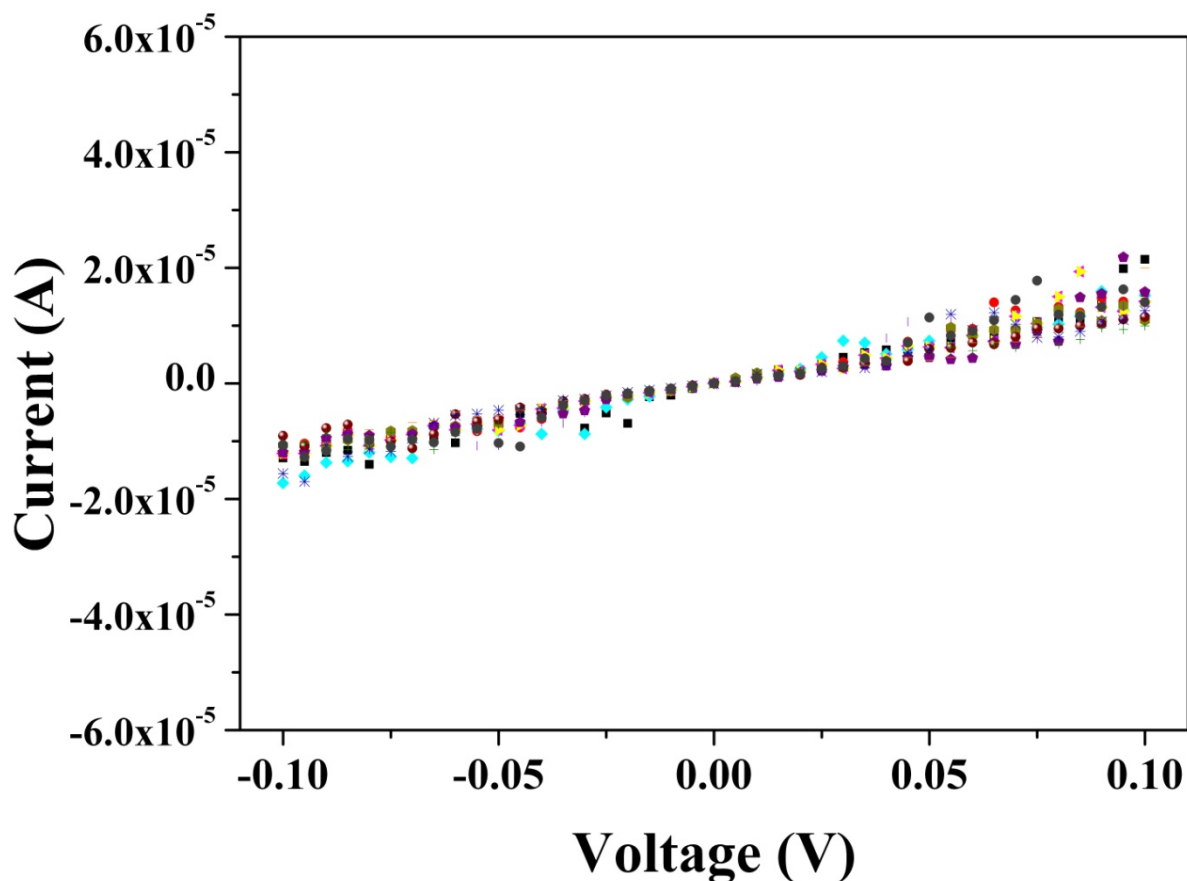

Figure S7. The I-V characteristics of ITO/C<sub>60</sub> (2.5 nm)/TPE-An (100 nm).

## The stabilities of the EL devices on glass and flexible PET substrate

The stabilities of devices on glass and flexible PET substrate and their half lifetimes are shown in the Fig. S8. The half lifetime at an initial luminance of  $1000 \text{ cd/m}^2$  ( $L_{01}$ ) is 120 h for EL device on glass and the half lifetime at an initial luminance of  $200 \text{ cd/m}^2$  ( $L_{02}$ ) is 38 h, respectively.

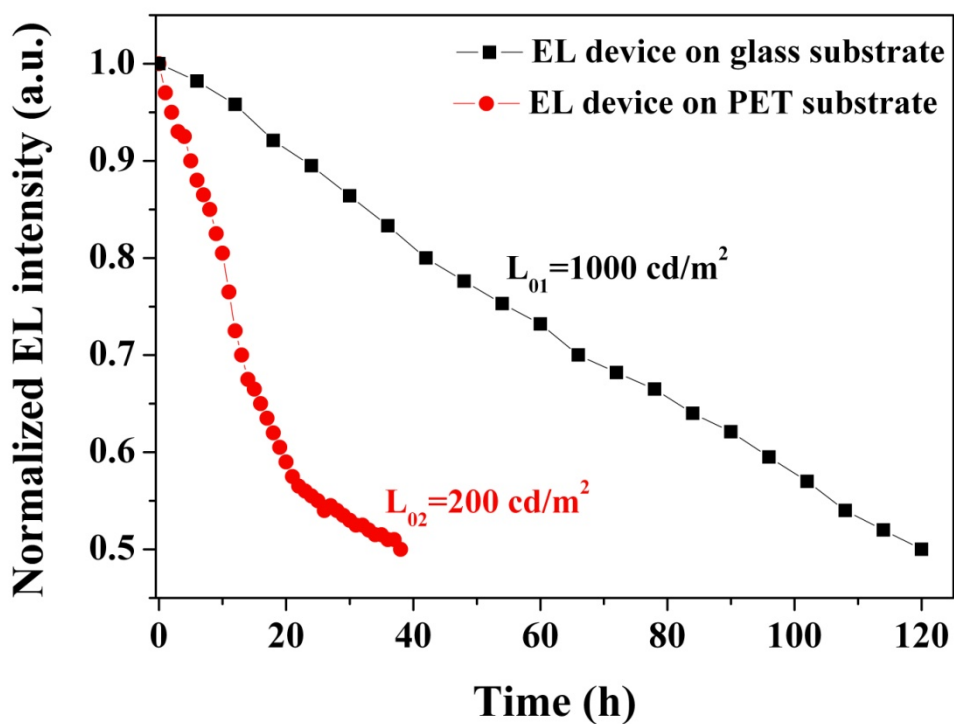

Figure S8. The curves of normalized luminance to the work time of the EL device on glass and PET substrate. Initial luminance is chosen to be respectively  $1000 \text{ cd/m}^2$  ( $L_{01}$ ) and  $200 \text{ cd/m}^2$  ( $L_{02}$ ) for the EL device on glass and PET substrate.
